# Supplementary material for: Influence of structural and textural parameters of carbon nanofibers on their capacitive behavior
Source: Springer Nature journal article supplement (doi:10.1007/s10853-015-9660-2), 2015-12-21
Supplement: MOESM1 [file 7018454]

# Influence of structural and textural parameters of carbon nanofibers on their capacitive behavior

Adam Moyseowicz, Agata Śliwak, Grażyna Gryglewicz\*

Department of Polymer and Carbonaceous Materials, Faculty of Chemistry, Wrocław University of Technology, Gdańska 7/9, 50-344 Wrocław, Poland

Table S1

The CCVD process conditions for synthesis of CNFs of different structures.

| CNF   | Catalyst                          | Carbon source                 | T <sub>reduction</sub><br>°C | T <sub>synthesis</sub><br>°C | Yield<br>g <sub>CNF</sub> /g <sub>cat</sub> |
|-------|-----------------------------------|-------------------------------|------------------------------|------------------------------|---------------------------------------------|
| HCNF1 | Ni/Al <sub>2</sub> O <sub>3</sub> | CH <sub>4</sub>               | 550                          | 650                          | 5.10                                        |
| HCNF2 | Ni/Al <sub>2</sub> O <sub>3</sub> | C <sub>3</sub> H <sub>8</sub> | 550                          | 500                          | 2.93                                        |
| PCNF  | Ni/Al <sub>2</sub> O <sub>3</sub> | C <sub>3</sub> H <sub>8</sub> | 550                          | 450                          | 3.34                                        |
| CNT   | Fe/Al <sub>2</sub> O <sub>3</sub> | C <sub>2</sub> H <sub>4</sub> | -                            | 650                          | 1.70                                        |

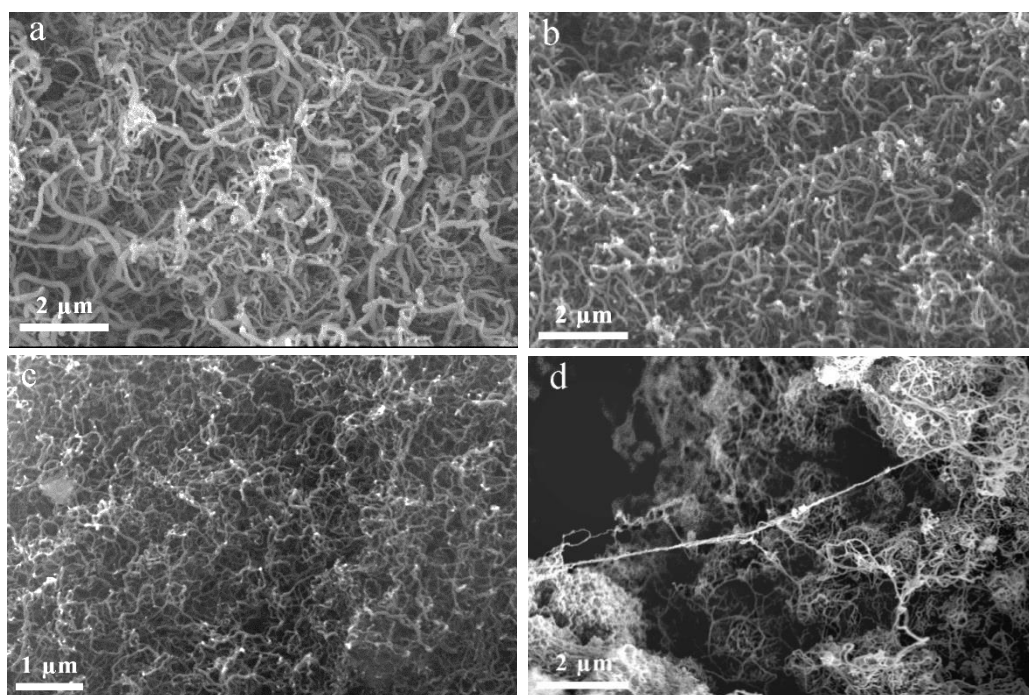

**Fig. S1** SEM images of HCNF1 (a), HCNF2 (b), PCNF (c) and CNT (d)

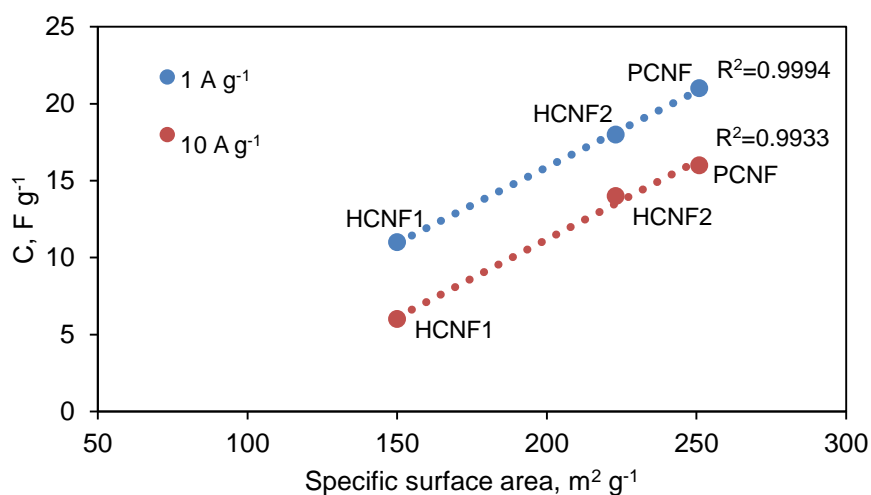

**Fig. S2** The relationship between the capacitance and the BET surface area for open-type CNF at different current loads

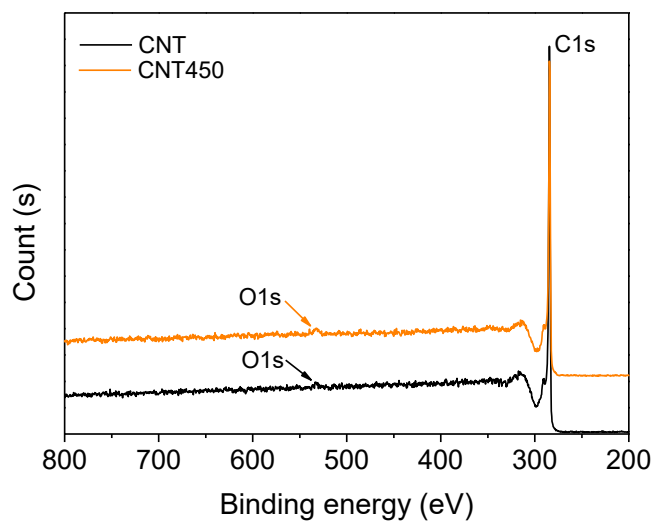

**Fig. S3** XPS survey spectra of CNT and CNT450

## ACKNOWLEDGEMENTS

This work was financed by a statutory activity subsidy from the Polish Ministry of Science and Higher Education for the Faculty of Chemistry of Wrocław University of Technology.

\*Corresponding author. [grazyna.gryglewicz@pwr.edu.pl](mailto:grazyna.gryglewicz@pwr.edu.pl) (G. Gryglewicz).
